# Supplementary material
Source: PubMed Central journal article supplement (PMC3259245)
Supplement: NIHMS333741-supplement-01.pdf [file NIHMS333741-supplement-01.pdf]

**Table 1** - Demographic and clinical WHICAP variables comparison between MRI infarct cases and controls.

|                              | Controls (N=487) | Cases (N=202)  | p-value |
|------------------------------|------------------|----------------|---------|
| Age, years $\pm$ SD          | 83.5 $\pm$ 5.7   | 83.4 $\pm$ 5.7 | 0.700   |
| Men, n (%)                   | 30 (146)         | 41.6 (84)      | 0.004*  |
| Myocardial Infarction, n (%) | 9.7 (47)         | 19.8 (40)      | 0.001*  |
| Hypertension, n (%)          | 71.7 (349)       | 81.2 (164)     | 0.010*  |
| Diabetes Mellitus, n (%)     | 22 (107)         | 28.7 (58)      | 0.063   |
| Hispanics, n (%)             | 36.9 (164)       | 30.5 (58)      | 0.150   |
| Blacks, n (%)                | 34.4 (153)       | 36.3 (69)      | 0.650   |

Values are present in n (number) or % (percentage). SD: Standard deviation IS: Ischemic stroke.

**Table 2-** ALOX5AP SNPs association with MRI infarct in the WHICAP cohort

| SNP id     | alleles | CEU     | YRI     | WHICAP cohort |          | MA,MAF  | OR   | SE   | p-value |
|------------|---------|---------|---------|---------------|----------|---------|------|------|---------|
|            |         | MA,MAF  | MA,MAF  | cases         | controls |         |      |      |         |
| rs9508829  | C/G     | C, 0.10 | C, 0.44 | 128           | 381      | C, 0.28 | 1.20 | 0.16 | 0.247   |
| rs4769870  | C/T     | T, 0.10 | T, 0.46 | 129           | 382      | T, 0.27 | 1.15 | 0.16 | 0.367   |
| rs10507391 | A/T     | A, 0.33 | T, 0.08 | 143           | 416      | T, 0.41 | 1.16 | 0.13 | 0.267   |
| rs9551963  | A/C     | A, 0.46 | A, 0.47 | 142           | 414      | C, 0.48 | 0.98 | 0.13 | 0.902   |

Values are present in n (number) or % (percentage). Bp: base pair; CEU\_HapMap: Caucasian population in HapMap, YRI: Yoruba population in HapMap, MA: minor allele, MAF: minimum allele frequency, OR: odd ratio, SE standard error, P: nominal p-value

**Table 3-** ALOX5AP SNPs association tests in the CHARGE meta-analysis.

| SNP id     | pos        | ref.coded | ref.noncoded | $\beta$ | SE   | meta p-value |
|------------|------------|-----------|--------------|---------|------|--------------|
| rs9508829  | 30,197,476 | C         | G            | 0.04    | 0.06 | 0.468        |
| rs4769870  | 30,201,511 | T         | C            | 0.04    | 0.06 | 0.468        |
| rs10507391 | 30,210,096 | A         | T            | -0.03   | 0.04 | 0.448        |
| rs9551963  | 30,230,547 | A         | C            | -0.03   | 0.04 | 0.518        |
